# Supplementary material for: Recombinant Decorin Fusion Protein Attenuates Murine Abdominal Aortic Aneurysm Formation and Rupture
Source: PubMed Central journal article supplement (PMC5696466; doi:10.1038/s41598-017-16194-8), 2017-11-20
Supplement: 41598_2017_16194_MOESM1_ESM.pdf [file 41598_2017_16194_MOESM1_ESM.pdf]

## **SUPPLEMENTAL DATA**

### **Recombinant Decorin Fusion Protein Attenuates Murine Abdominal Aortic Aneurysm Formation and Rupture**

#### **Authors and affiliations:**

Yue Shen<sup>1,2</sup>, Valerio Russo<sup>1,2</sup>, Matthew R. Zeglinski<sup>2</sup>, Stephanie L. Sellers<sup>1,3</sup>, Zhengguo Wu<sup>4,5</sup>, Cameron Oram<sup>1,2</sup>, Stephanie Santacruz<sup>1,2</sup>, Yulia Merkulova<sup>1,2</sup>, Christopher Turner<sup>1,2</sup>, Keerit Tauh<sup>2</sup>, Hongyan Zhao<sup>1,2</sup>, Tatjana Bozin<sup>1</sup>, Lubos Bohunek<sup>1</sup>, Haishan Zeng<sup>4,5</sup>, Michael A. Seidman<sup>1</sup>, R. Chris Bleackley<sup>6</sup>, Bruce M. McManus<sup>1,10</sup>, Erkki Ruoslahti<sup>7,8</sup>, Tero A. H. Järvinen<sup>9</sup>, and David J. Granville<sup>1,2\*</sup>

<sup>1</sup>Centre for Heart Lung Innovation, St. Paul's Hospital, University of British Columbia, Vancouver, BC, Canada; <sup>2</sup>International Collaboration On Repair Discoveries (ICORD), Vancouver Coastal Health Research Institute and Department of Pathology and Laboratory Medicine, University of British Columbia, Vancouver, BC, Canada; <sup>3</sup>Department of Radiology, University of British Columbia & St. Paul's Hospital, Vancouver, BC, Canada; <sup>4</sup>Imaging Unit, Integrative Oncology Department, BC Cancer Agency Research Centre, Vancouver, BC, Canada; <sup>5</sup>Photomedicine Institute, Department of Dermatology and Skin Science, University of British Columbia & Vancouver Coastal Health Research Institute, Vancouver, BC, Canada; <sup>6</sup>Department of Biochemistry, University of Alberta, Edmonton, AB, Canada; <sup>7</sup>Cancer Research Center, Sanford-Burnham Prebys Medical Discovery Institute, La Jolla, CA 92037, USA; <sup>8</sup>Center for Nanomedicine and Department of Molecular Cellular and Developmental Biology, University of California, Santa Barbara, Santa Barbara, CA 93106-9610, USA; <sup>9</sup>Faculty of Medicine & Life Sciences, University of Tampere & Department of Orthopedics & Traumatology, Tampere University Hospital, Tampere, Finland. <sup>10</sup>PROOF Centre of Excellence, University of British Columbia & Providence Health Care, Vancouver, BC, Canada.

#### **\*Correspondence:**

David J Granville, ICORD Centre, Rm 4470, 818 West 10th Ave.

Vancouver, BC, V5Z 1M9, CANADA. Tel: +1-604-806-9267; Fax: +1-604-806-8351; Email.

[dgranville@icord.org](mailto:dgranville@icord.org)

Control peptide

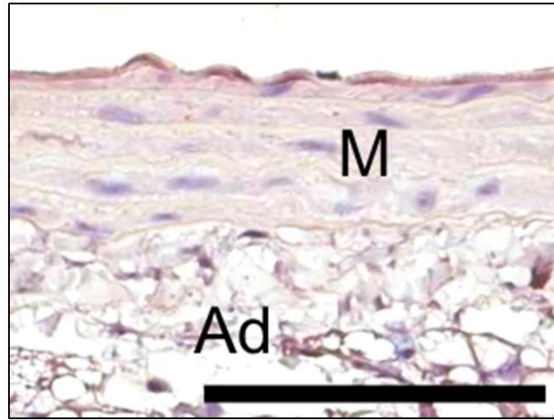

CAR peptide

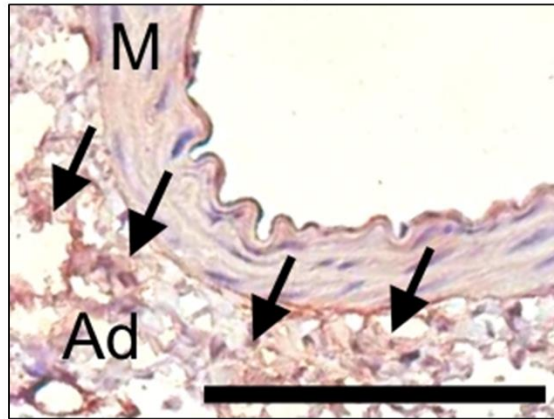

**Supplemental Figure S1. CAR peptide accumulates at adventitia layer of abdominal aorta.** Representative FITC/FAM staining of adventitia in abdominal aortas from Ang II-infused ApoE-KO mice treated with FAM-labelled control peptide (upper) or FITC-labelled CAR peptide (lower). Arrows indicate the positive CAR staining. Scale bar: 100  $\mu$ m.

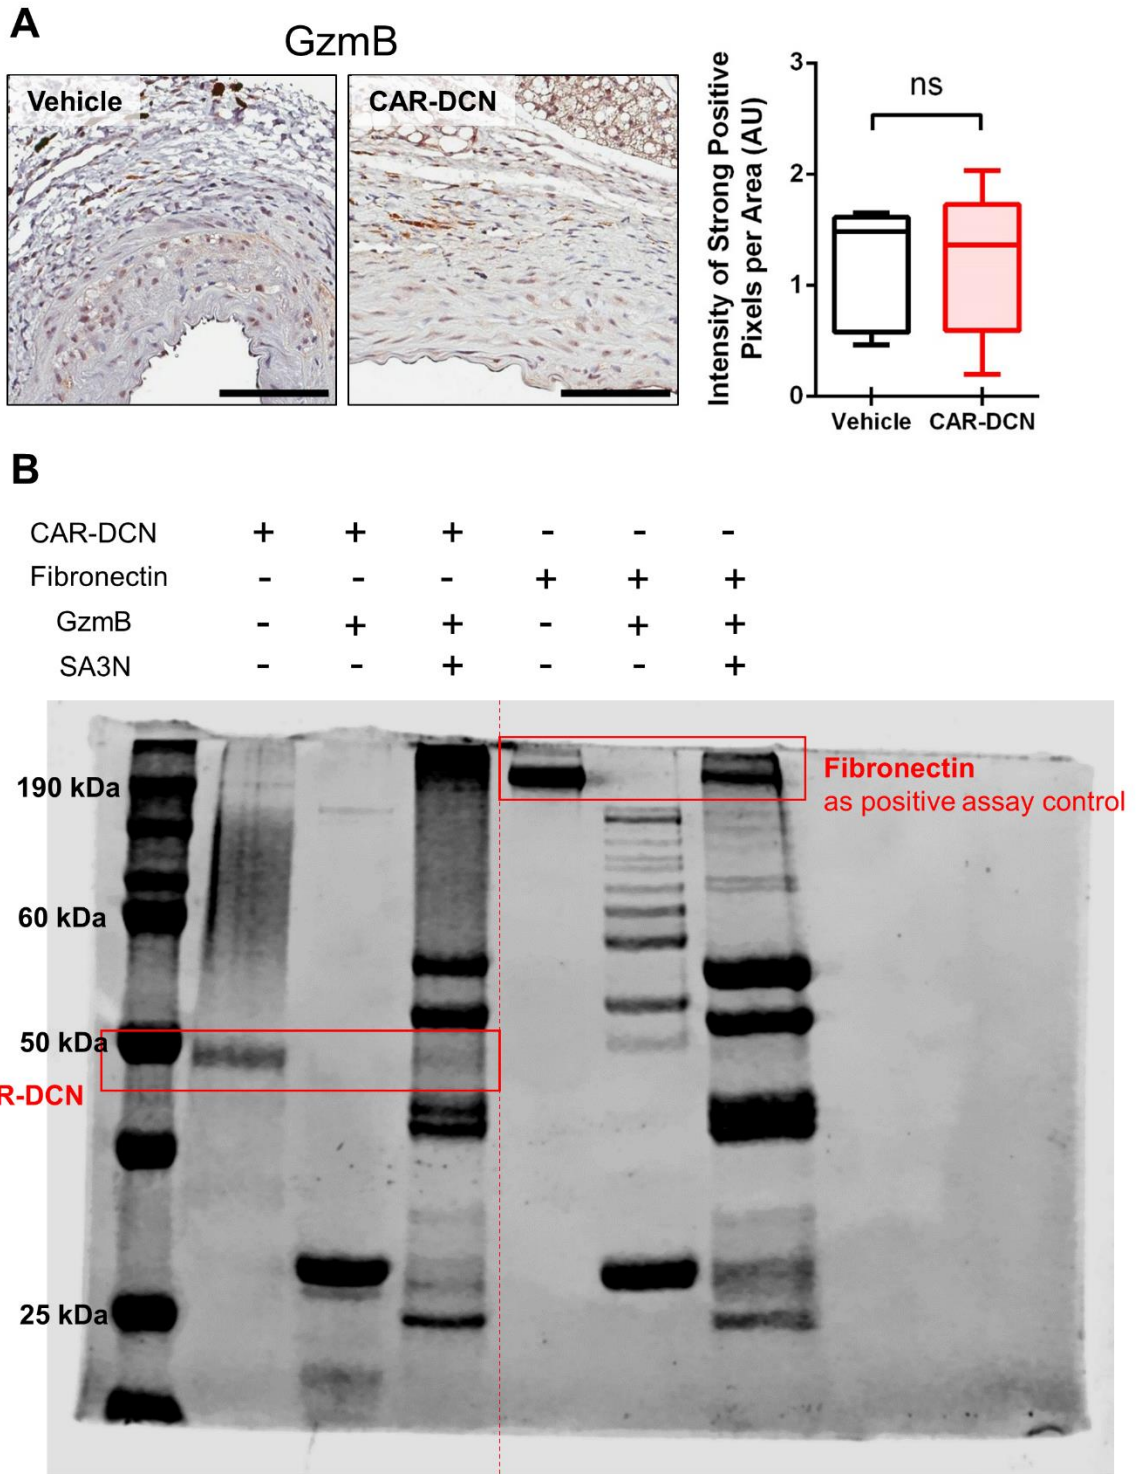

**Supplemental Figure S2**

**Supplemental Figure S2. CAR-DCN treatment does not affect aortic GzmB expression. (A)** Representative GzmB staining (left) and quantification of GzmB staining intensity (right) in adventitia of abdominal aortas from surviving ApoE-KO mice in different treatment groups ( $n \geq 5$  per group). Scale bar: 100  $\mu\text{m}$ . Results are expressed as box-and-whisker plot, ns = not significant. **(B)** GzmB-mediated CAR-DCN cleavage assay. The presence of SA3N inhibits GzmB-mediated CAR-DCN cleavage. Fibronectin was used as positive control.

| Days after surgery |    |    |    |    |    |    |    |    |    | Color Key |     |
|--------------------|----|----|----|----|----|----|----|----|----|-----------|-----|
| 0                  | 1  | 2  | 3  | 4  | 5  | 6  | 7  | 8  | 9  | iv        | sac |
| 10                 | 11 | 12 | 13 | 14 | 15 | 16 | 17 | 18 | 19 | ip        | NT  |
| 20                 | 21 | 22 | 23 | 24 | 25 | 26 | 27 | 28 |    |           |     |

**Supplemental Figure S3**

**Supplemental Figure S3. Treatment Regimen.** Paradigm for regimen of CAR-DCN or vehicle administration in Ang II-infused ApoE-KO mice. iv, intravenous injection; ip, intraperitoneal injection; sac, sacrifice; NT, no treatment.
